# Supplementary material for: A saturated reaction in repressor synthesis creates a daytime dead zone in circadian clocks
Source: PubMed Central journal article supplement (PMC6396941; doi:10.1371/journal.pcbi.1006787), 2019-02-19
Supplement: pcbi.1006787.s002.pdf [file pcbi.1006787.s002.pdf]

**S1 Table. Values of reaction parameters in the models**

Eqs. (1-3)

|        | $\gamma_1$ | $\gamma_2$ | $\gamma_3$ | $K_1$ | $K_m$  | $n$ | $\tau$ |
|--------|------------|------------|------------|-------|--------|-----|--------|
| Fig. 2 | 0.75       | 0.37       | 0.6        | 0.094 | 0.001  | 4   | 0.2853 |
| Fig. 3 | 0.75       | 0.37       | 0.6        | 0.094 | 0.0005 | 4   | 0.2982 |
|        |            |            |            |       | 0.0025 |     | 0.2606 |
|        |            |            |            |       | 0.005  |     | 0.2374 |

Eqs. (8-10) and Eqs. (8, 10, 11)

|        | $\gamma_1$ | $\gamma_2$ | $\gamma_3$ | $K_1$ | $K_t$ | $K_m$ | $n$ | $\tau$ |
|--------|------------|------------|------------|-------|-------|-------|-----|--------|
| Fig. 4 | 18.5       | 0.031      | 14.1       | 1.83  | -     | 0.025 | 4   | 1.034  |
| Fig. 5 | 18.5       | 0.031      | 14.1       | 1.83  | 0.015 | 0.025 | 4   | 1.034  |
| Fig. 6 | 18.5       | 0.031      | 14.1       | 1.83  | 0.01  | 0.025 | 4   | 1.089  |
|        |            |            |            |       | 0.06  |       |     | 0.8588 |
|        |            |            |            |       | 0.1   |       |     | 0.7979 |

Eqs. (8, 10, 12)

|          | $\gamma_1$ | $\gamma_2$ | $\gamma_3$ | $K_1$ | $K_t$ | $K_m$  | $n$ | $h$ | $\tau$ |
|----------|------------|------------|------------|-------|-------|--------|-----|-----|--------|
| Fig. 7   | 18.5       | 0.031      | 14.1       | 1.83  | 0.015 | 0.053  | 4   | 1   | 0.912  |
|          |            |            |            |       |       |        |     | 2   | 0.9619 |
|          |            |            |            |       |       |        |     | 4   | 0.9872 |
| Fig. S14 | 0.66       | 0.156      | 0.062      | 0.114 | 0.22  | 0.0645 | 4   | 4   | 0.7675 |

Eqs. (8, S9a,b)

|         | $\gamma_1$ | $\gamma_2$ | $\gamma_3$ | $K_1$ | $\kappa_t$ | $K_m$ | $n$ | $\tau$ |
|---------|------------|------------|------------|-------|------------|-------|-----|--------|
| Fig. S7 | 77.5       | 6.56       | 5.19       | 0.114 | 0.07       | 0.023 | 4   | 0.0943 |

Eq. (S10)

|         | $\gamma_1$ | $\gamma_x$ | $\gamma_2$ | $K_1$ | $K_x$ | $K_m$ | $n$ | $\tau$ |
|---------|------------|------------|------------|-------|-------|-------|-----|--------|
| Fig. S8 | 6.55       | 4.4        | 1.04       | 0.837 | 0.035 | 0.061 | 4   | 0.1729 |
